# Supplementary material for: Porous perovskite CaMnO3as an electrocatalyst for rechargeable Li–O2batteries
Source: Royal Society of Chemistry journal article supplement (doi:10.1039/c3cc48207c), 2013-12-02
Supplement: c3cc48207c.pdf [file c3cc48207c.pdf]

# Electronic Supplementary Information (ESI)

## Porous perovskite $\text{CaMnO}_3$ as electrocatalyst for rechargeable $\text{Li-O}_2$ batteries

Xiaopeng Han, Yuxiang Hu, Jingang Yang, Fangyi Cheng,\* and Jun Chen\*

5

Key Laboratory of Advanced Energy Materials Chemistry (Ministry of Education), College of Chemistry, Collaborative Innovation Center of Chemical Science and Engineering, Nankai University, Tianjin 300071, China. Fax: 86-22-23509571, Tel: 86-22-23504482

(F. Cheng) E-mail: fycheng@nankai.edu.cn; (J. Chen) E-mail: chenabc@nankai.edu.cn

10

### Experimental Section

**Material Synthesis.** Porous perovskite  $\text{CaMnO}_3$  was synthesized using the citrate gel process. Typically,  $\text{Ca}(\text{NO}_3)_2 \cdot 4\text{H}_2\text{O}$  and  $\text{Mn}(\text{NO}_3)_2$  with molar ratio of 1:1 was firstly dispersed in distilled water. After dissolved completely, citric acid and ethylene glycol were added to the solution. The water was removed at 85 °C for several hours to form a gel and then dried in vacuum at 80 °C overnight. The gel was heated at 400 °C for 2 h and then at 900 °C for 3 h in Air with a heating rate of 5 °C /min.

**Materials characterization.** Powder X-ray diffraction (XRD) analysis was characterized by a MiniFlex600 X-ray generator with a  $\text{Cu K}\alpha$  radiation. Fourier Transform Infrared (FTIR) spectroscopies were collected on a FTIR-650 spectrometer (Tianjin Gangdong) with a resolution of 2  $\text{cm}^{-1}$ . Morphology structures were analysed using scanning electron microscopy (SEM, JEOL JSM7500F), and transmission electron microscopy (TEM, Philips Tecnai F20, 200 kV), Brunauer-Emmett-Teller (BET) surface area was measured using  $\text{N}_2$  adsorption-desorption at 77 K on a BELsorp-Mini instrument.

**Cell assembly.** The non-aqueous  $\text{Li-O}_2$  cells were prepared using 2023-type coin cell. All the cells were packaged in an argon-filled glove box. The electrochemical batteries were composed of a lithium metal anode, a glass fiber

separator, an air electrode, and electrolyte containing 1 M LITFSI (lithium bis-(trifluoromethanesulfonyl)-imide) in TEGDME (tetraethylene glycol dimethyl ether) dried by molecular sieve. The air electrodes were prepared by casting a mixture of 30 wt% catalyst + 70 wt% Vulcan carbon XC-72 + 10 wt% polytetrafluoroethene (PTFE) or 90 % Vulcan carbon XC-72 + 10 wt% PTFE onto a nickel foam current collector. After completing assembling, the batteries were transferred to a sealed glass container filled with high-purity oxygen.

**Electrochemical Measurements.** Electrochemical performance of the cells were conducted in 1 atm O<sub>2</sub> at room temperature after a 5 h rest period using a LAND-CT2001A battery-testing instrument. The specific capacity and current density were based on the amount of carbon used into the catalysts. The cyclic voltammograms (CVs) were carried out within 2.0–4.6 V at room temperature on parstat 263A workstation (AMETEK). The electrochemical impedance spectroscopy (EIS) was performed using Parstat 2273 potentiostat/galvanostat workstation (AMETEK) at a frequency range of 100 kHz to 100 mHz.

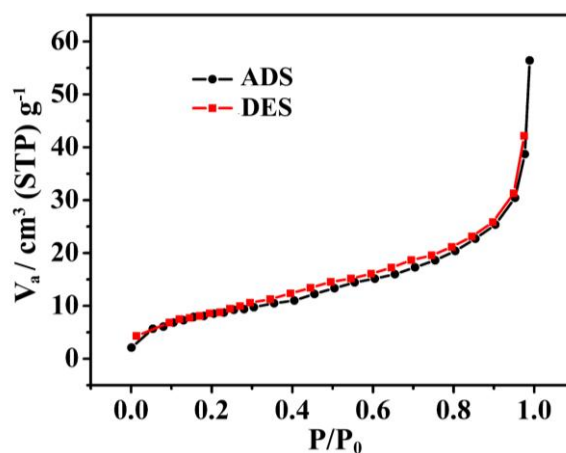

**Fig. S1** Nitrogen adsorption and desorption isotherms at 77 K for as-prepared porous CaMnO<sub>3</sub>.

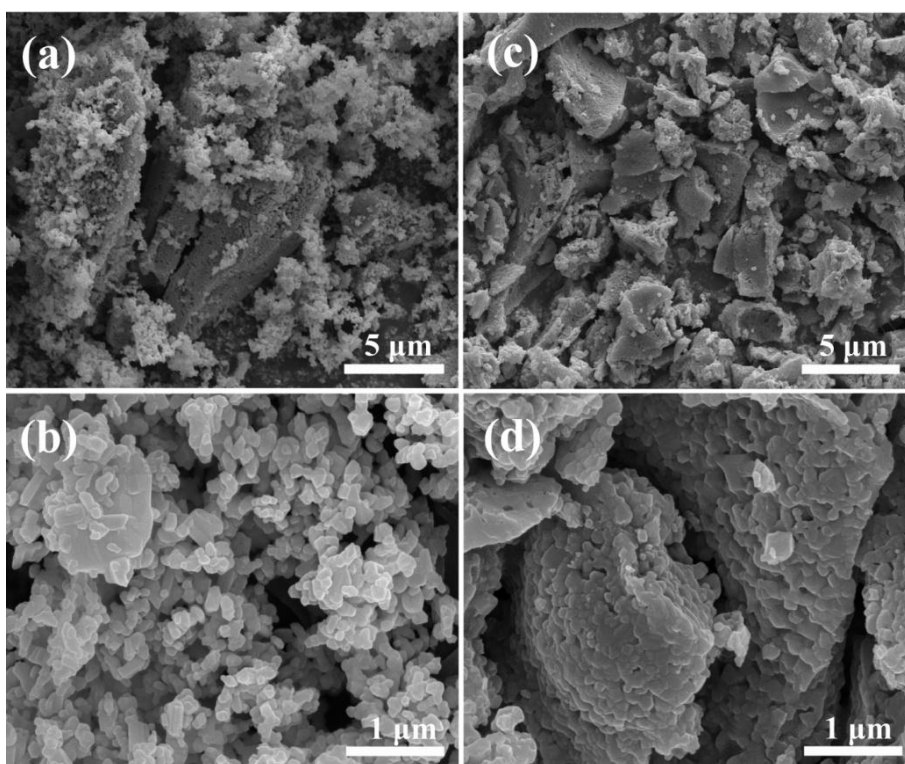

**Fig. S2** Prepared CaMnO<sub>3</sub> with different molar ratio of citric acid to total metal cations: (a,b) 2:1 and (c,d) 3:1.

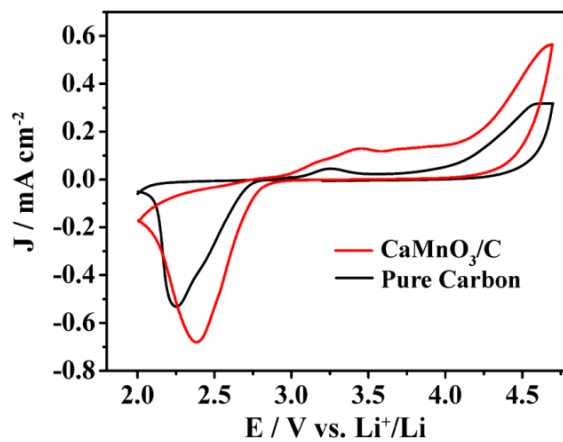

**Fig. S3** CV curves of CaMnO<sub>3</sub>/C and carbon-only electrode at a scan rate of 0.1 mV/s.

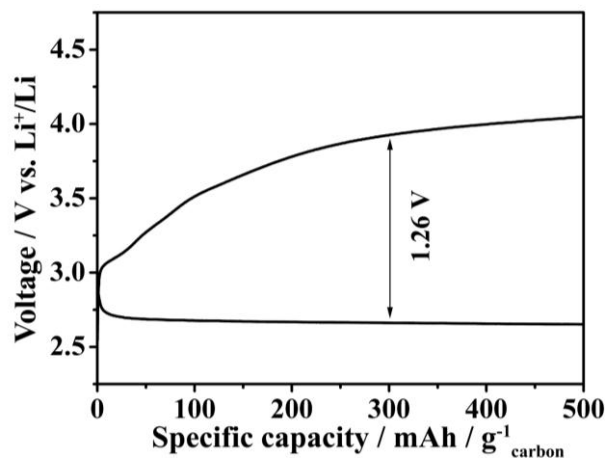

**Fig. S4** Discharge/charge curves of Pt/C cathode at a current density of 50 mA g<sup>-1</sup> carbon with controlled capacity of 500 mAh g<sup>-1</sup> carbon.

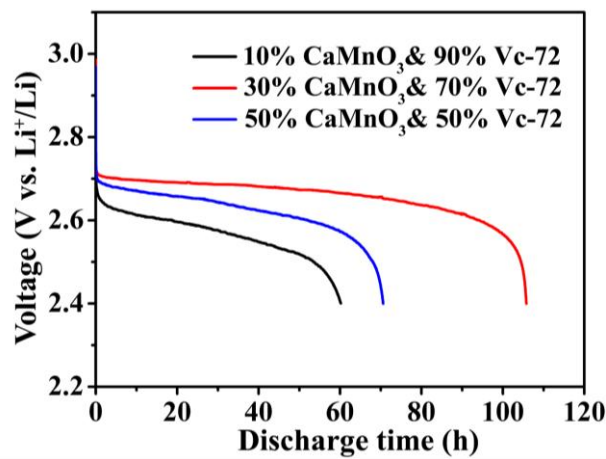

**Fig. S5** Influence of different amount of conductive carbon additives on the discharge performance of assembled Li-O<sub>2</sub> batteries at a current density of 50 mA/g<sup>-1</sup> carbon.

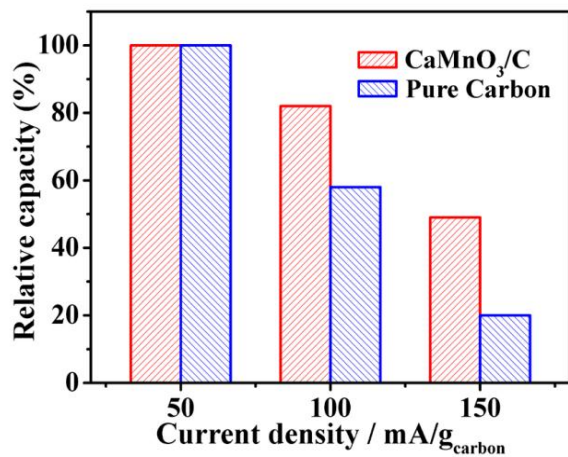

**Fig. S6** Relative discharge capacities at different current densities of CaMnO<sub>3</sub>/C and carbon-only batteries.

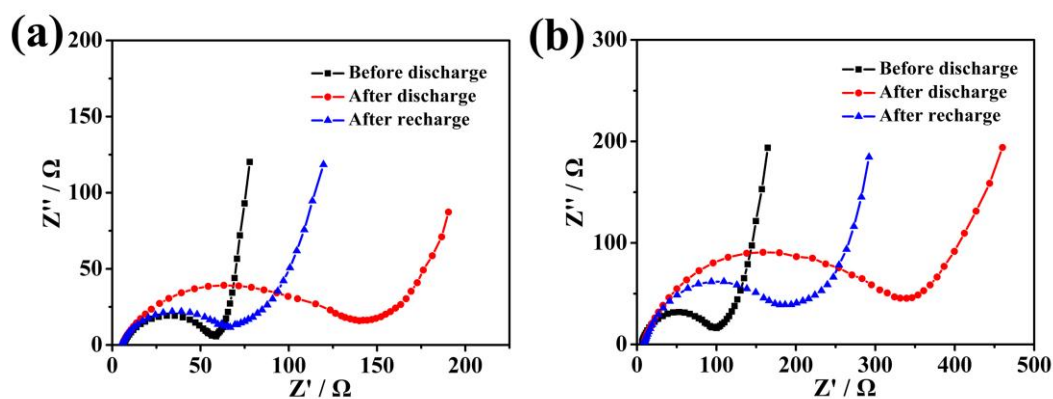

**Fig. S7** Electrochemical impedance spectroscopy measurements of CaMnO<sub>3</sub>/C (a) and carbon-only (b) electrodes at different discharge/recharge states.

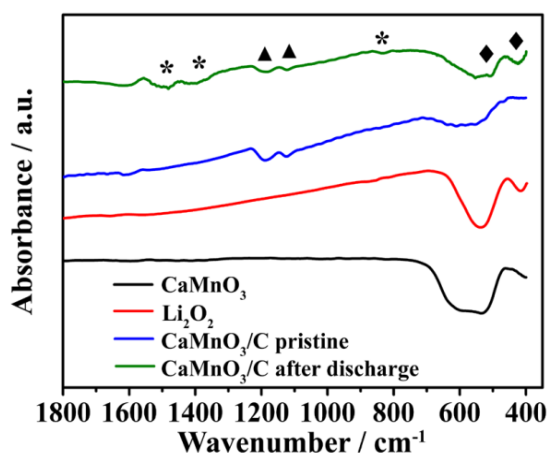

**Fig. S8** FTIR spectroscopy of pristine and discharged (2.0 V) CaMnO<sub>3</sub>/C-based electrode. The neat CaMnO<sub>3</sub> and Li<sub>2</sub>O<sub>2</sub> are listed for comparison. The signals of Li<sub>2</sub>O<sub>2</sub>, Li<sub>2</sub>CO<sub>3</sub> and PTFE are marked by ♦, \* and ▲, respectively.

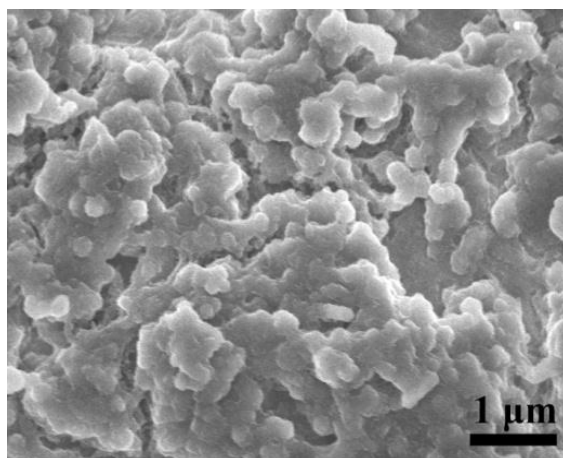

**Fig. S9** SEM image of the carbon-only electrode after charging.
